# Supplementary material
Source: PubMed Central journal article supplement (PMC4802997)

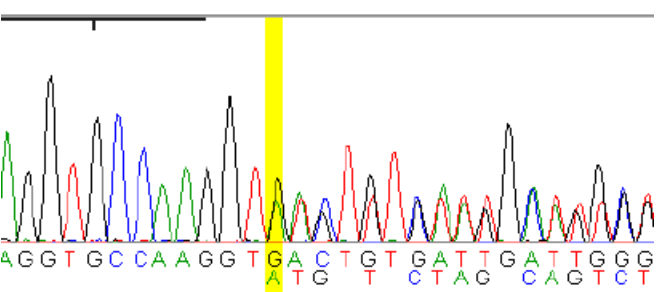

P2: P1's mother

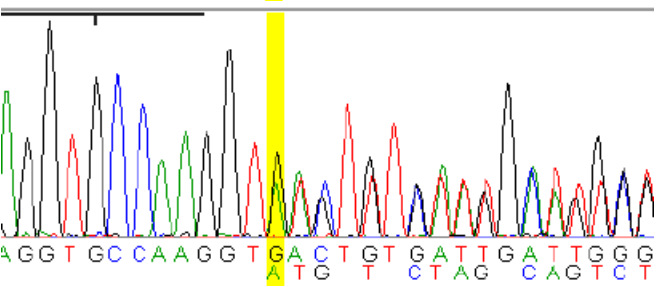

P1

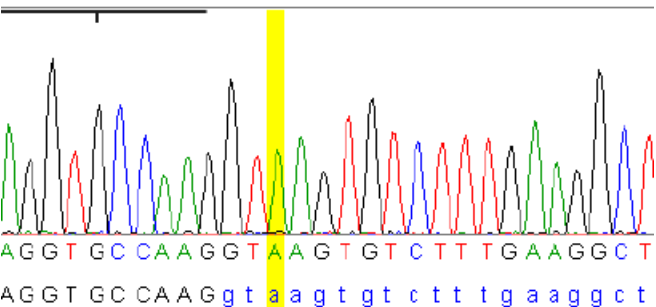

Normal control

Supplement: msy-0006-0281-s01.pdf [file msy-0006-0281-s01.pdf]
